# Supplementary material for: Efficient planar heterojunction perovskite solar cells employing graphene oxide as hole conductor
Source: Royal Society of Chemistry journal article supplement (doi:10.1039/c4nr03181d), 2014-01-01
Supplement: c4nr03181d1.pdf [file c4nr03181d1.pdf]

Electronic Supplementary Information

## **Efficient Planar Heterojunction Perovskite Solar Cell Employing Graphene Oxide as Hole Conductor**

**Zhongwei Wu,<sup>a</sup> Sai Bai,<sup>b</sup> Jian Xiang,<sup>a</sup> Zhongcheng Yuan,<sup>a</sup> Yingguo Yang,<sup>c</sup> Wei Cui,<sup>a</sup>  
Xingyu Gao,<sup>c</sup> Zhuang Liu,<sup>a</sup> Yizheng Jin,<sup>b</sup> and Baoquan Sun<sup>\*a</sup>**

<sup>a</sup> Jiangsu Key Laboratory for Carbon-Based Functional Materials & Devices, Institute of Functional Nano & Soft Materials (FUNSOM) and Collaborative Innovation Center of Suzhou Nano Science and Technology, Soochow University, 199 Ren'ai Road, Suzhou, 215123, People's Republic of China; E-mail: bqsun@suda.edu.cn

<sup>b</sup> State Key Laboratory of Silicon Materials, Cyrus Tang Center for Sensor Materials and Applications, Department of Materials Science and Engineering, Zhejiang University, Hangzhou 310027, People's Republic of China

<sup>c</sup> Shanghai Synchrotron Radiation Facility, Shanghai Institute of Applied Physics, Chinese Academy of Sciences, 239 Zhangheng Road, Pudong New Area, Shanghai 201204, People's Republic of China

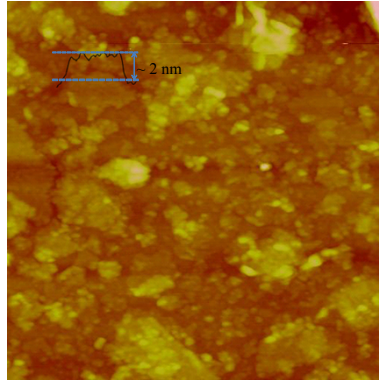

**Fig. S1** AFM image of GO film spin-coated on Si substrates. The GO film is prepared from the suspension concentration of 0.25 mg/ml. The scan size is  $1\ \mu\text{m} \times 1\ \mu\text{m}$ .

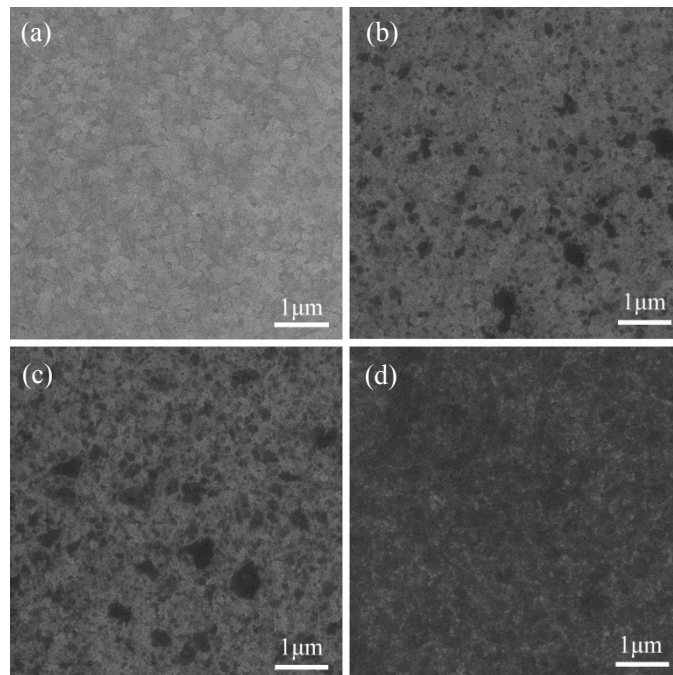

**Fig. S2** SEM images of (a) bare ITO and ITO/GO substrates. The GO films were prepared from the suspension concentrations from 0.25 mg/ml to 4 mg/ml: (b) 0.25 mg/ml; (c) 1 mg/ml; (d) 4 mg/ml.

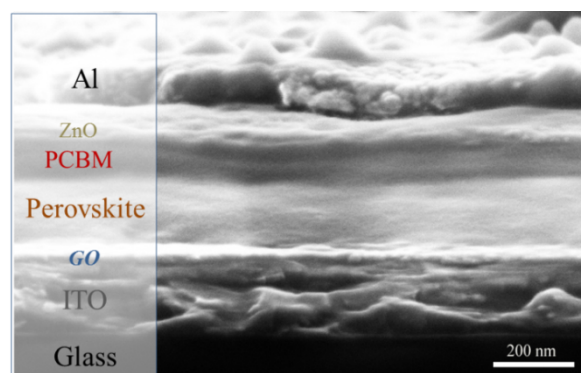

**Fig. S3** Cross-sectional SEM image of the inverted device configuration with a 20-nm-thick GO layer.

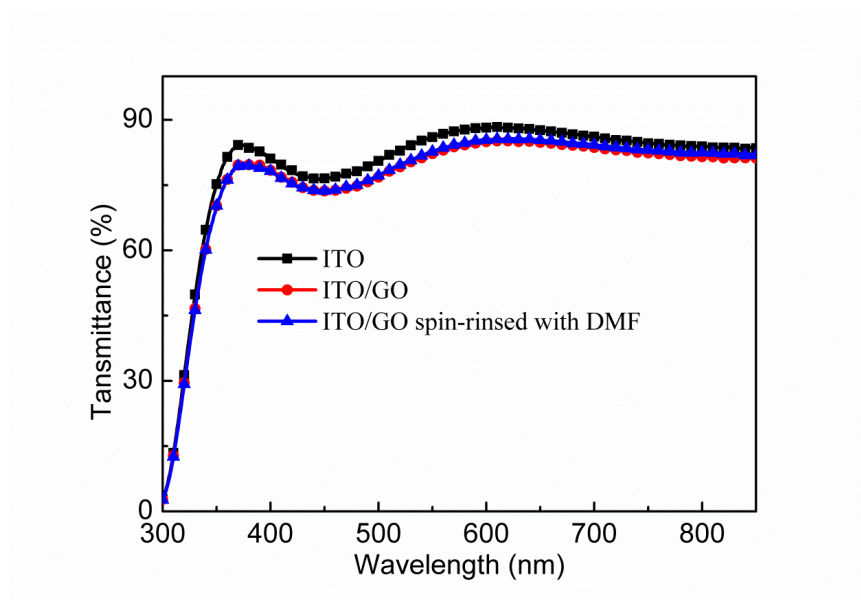

**Fig. S4** The transmittance spectra of ITO, ITO/GO (20 nm) and ITO/GO (20nm) substrates spin-rinsed with DMF.

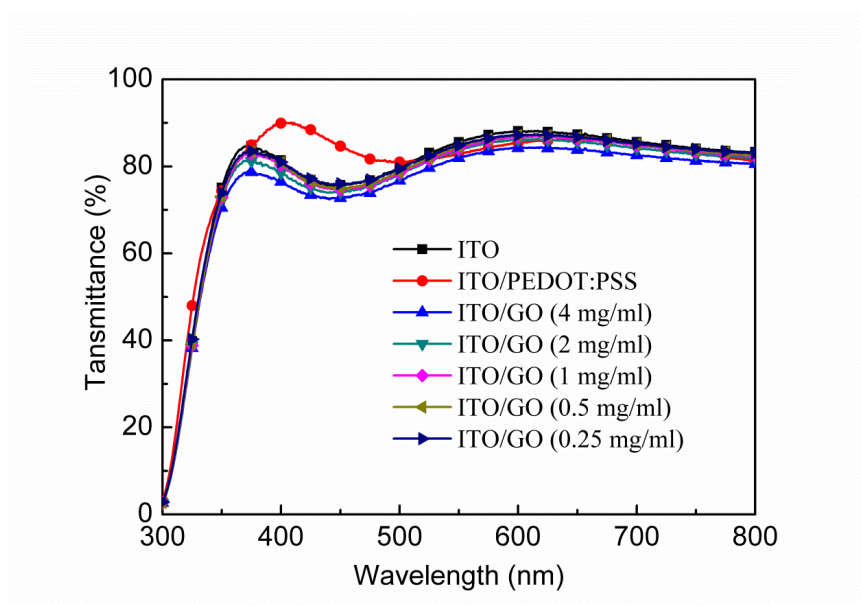

**Fig. S5** The transmittance spectra of ITO, ITO/PEDOT and ITO/GO substrates. The thickness of GO is from 2 to 20 nm, and the films were prepared from the suspension concentrations from 0.25 mg/ml to 4 mg/ml.

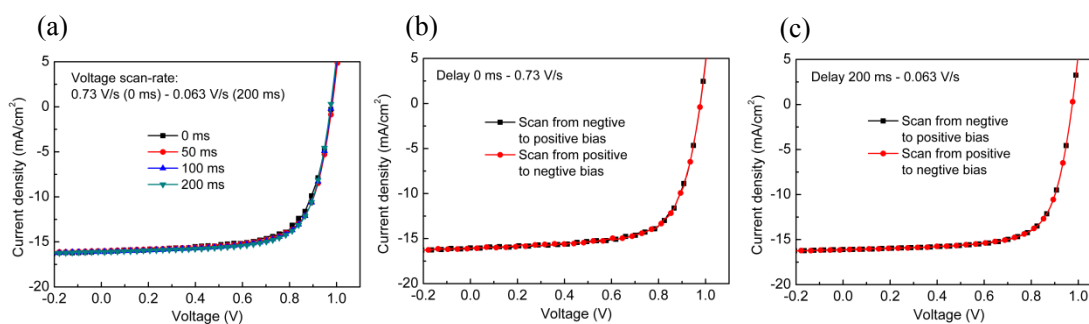

**Fig. S6** (a) J–V curves of an optimal GO-based device measured with different delays between measurement points corresponding to voltage scan-rates ranging from 0.73 V/s to 0.063 V/s and different sweep directions with a voltage scan-rate of (b) 0.73 V/s and (c) 0.063 V/s.

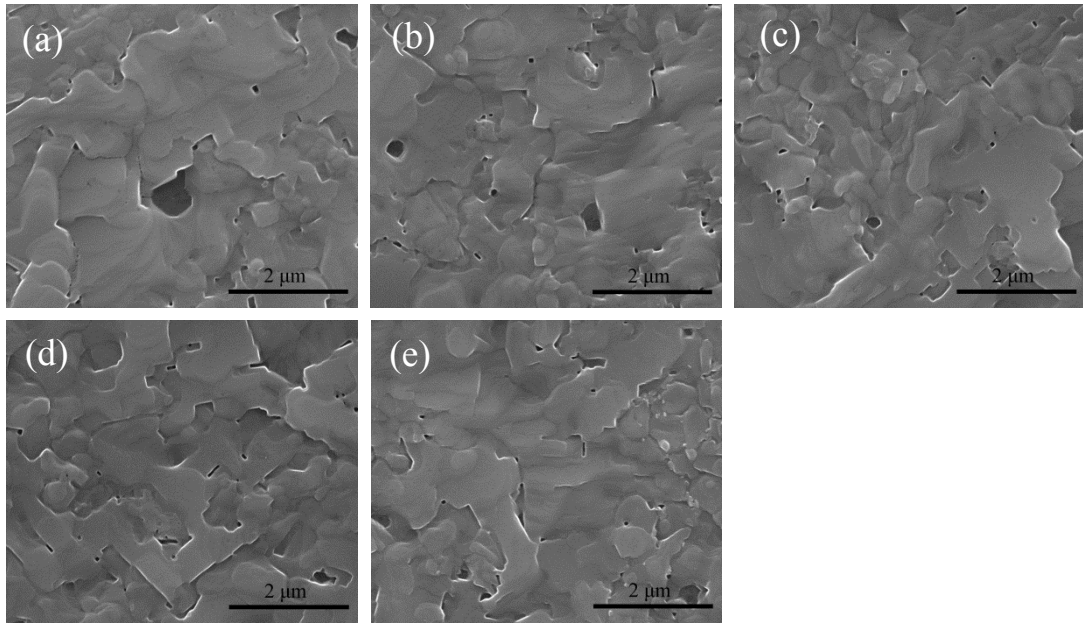

**Fig. S7** SEM images of perovskite films ( $\text{CH}_3\text{NH}_3\text{PbI}_{3-x}\text{Cl}_x$ ) on ITO/GO substrates.

The thickness of GO is from 2 to 20 nm, and the films were prepared from the suspension concentrations from 0.25 mg/ml to 4 mg/ml: (a) 4 mg/ml; (b) 2 mg/ml; (c) 1 mg/ml; (d) 0.5 mg/ml; (e) 0.25 mg/ml.

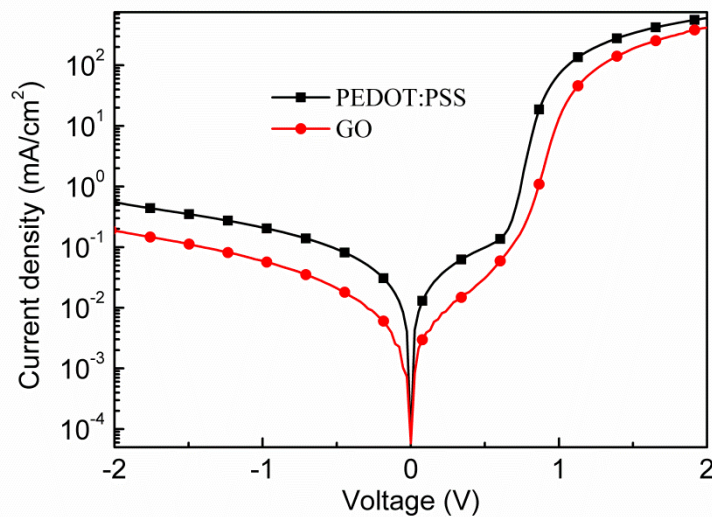

**Fig. S8** J–V curves of inverted PHJ perovskite solar cell employing PEDOT:PSS or GO (2 nm) as hole conductor under dark condition.

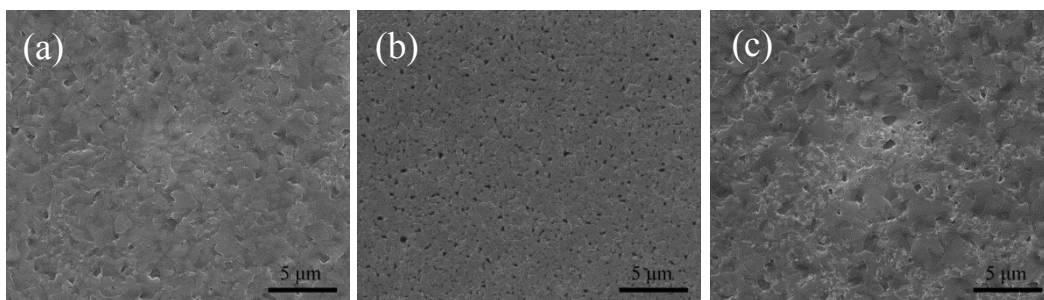

**Fig. S9** Low resolution SEM images of perovskite films ( $\text{CH}_3\text{NH}_3\text{PbI}_{3-x}\text{Cl}_x$ ) on the different substrates: (a) ITO/GO (2 nm); (b) ITO/PEDOT:PSS and (c) bare ITO.

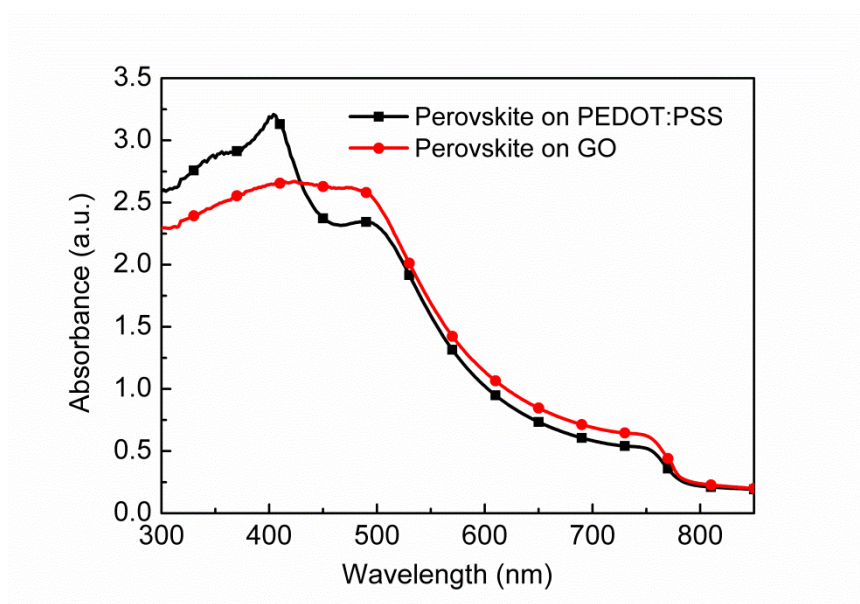

**Fig. S10** UV-vis absorption spectra of perovskite films ( $\text{CH}_3\text{NH}_3\text{PbI}_{3-x}\text{Cl}_x$ ) on ITO/PEDOT:PSS or ITO/GO (2 nm) substrates.
